# Supplementary material
Source: PubMed Central journal article supplement (PMC5772763)
Supplement: NIHMS897190-supplement-8.pdf [file NIHMS897190-supplement-8.pdf]

# Table S2

## shRNA sequences used in this study

| shRNA      | Sense sequence          |
|------------|-------------------------|
| UGCG.1275  | GTGGACCAAACACTACGAATTAA |
| UGCG.1514  | TCCGCGAATCCATGACAATAT   |
| UGCG.1376  | ATGTGTTTCAGATGGGATATTA  |
| SGMS1.1996 | CACACTATGGCCAATCAGCAA   |

## siRNA sequences used in this study

| siRNA                          | Target sequence       |
|--------------------------------|-----------------------|
| siUGCG(SASI_Hs01_00050364)     | GTGGAAACATTAGCTGATAAT |
| siUGCG(SASI_Hs01_00050365)     | GTTGCAAAGTATGATCTTA   |
| siUGCG(SASI_Hs01_00050366)     | GAAGATTACTTTATGGCCA   |
| siSGMS1(SASI_Hs01_00060990)    | CTTGTAGGACTCTGGTTAA   |
| siSGMS1(SASI_Hs01_00060991)    | CACATAACAGCTGTACAAA   |
| siSGMS1(SASI_Hs01_00060992)    | GCCAAATGGGTATAGGAAA   |
| Scramble control(SIC002-1NMOL) |                       |

# Table S3

Primers used for quantitative Real-Time PCR

| Gene  | Forward primer           | Reverse primer           |
|-------|--------------------------|--------------------------|
| SGMS1 | 5'-TAGTTGGCACGCTGTACCTG  | 5'-GGCCGCTGTACAGATAGTCC  |
| SGMS2 | 5'-TCCAAAGCTCAATGGAGACTC | 5'-GTGTGACCGCTGAAGAGGAA  |
| UGCG  | 5'-TGCTCAGTACATTGCCGAAG  | 5'-TTCGTAGTTTGGTCCACCTG  |
| ASAH1 | 5'-ACGTACAGAGGTGCAGTTCC  | 5'-AAGTTGCCAAGTAGGCCAGG  |
| ASAH2 | 5'-ACGTTGCATCAACACAGGAG  | 5'-CTCTGATACATGGCCCGTCC  |
| ACER1 | 5'-CCCAGTTCATCCGCCTGGTC  | 5'-ACCTCAATCAGGTGCCGAAG  |
| ACER3 | 5'-TGCAGCTATTGGATGAACTC  | 5'-CCATGGATAAACCCATGTAAC |
| SMPD1 | 5'-CTCCCCTGGCTCTATGAAG   | 5'-AGAGAGATGAGGCGGAGACC  |
| SMPD2 | 5'-GGGGCATTCCGTAATTGAGC  | 5'-GTGTGCAGCTGGGTAGGTAG  |
| ENPP7 | 5'-CCAGAGGTGGTGGGACAAC   | 5'-TTTGTAGTTGTGTGCGATGC  |
| CERS1 | 5'-GGCCACTCCATCTACGCTAC  | 5'-GTGAACTCAAGCTGCACGTC  |
| CERS2 | 5'-TTAACTACGCGGGATGGAAG  | 5'-GGCAGGATAGAGCTCCAGTG  |
| CERS3 | 5'-TGGACGCAGACCTGTAACAC  | 5'-GAAAAGAAAGGCTCGAGGTG  |
| CERS4 | 5'-TGGTGCTGCTGTTACACGAT  | 5'-GTGGGAAAGAGGACCAGTCG  |
| CERS5 | 5'-ATGCTTCATGGTGGCTCCTC  | 5'-CTGCCTCCCATGTGACCATT  |
| CERS6 | 5'-CAAGGCTGGGAAGTGAACC   | 5'-GTGGGGATTCTTTCCCGGAG  |
| GBA   | 5'-CCTGCCCTTGGTACCTTCAG  | 5'-TGTCATGGCCCCTCCAAATC  |
| GALC  | 5'-AGACAACAGACGGCACTGAG  | 5'-ATGACCATGGCAACCCAATG  |
| RPL19 | 5'-AAGCCTGTGACGGTCCATTC  | 5'-CTTCTTAGATTCACGGTATC  |
